# Supplementary material
Source: PubMed Central journal article supplement (PMC5472441)
Supplement: jciinsight-2-89762-s001.pdf [file jciinsight-2-89762-s001.pdf]

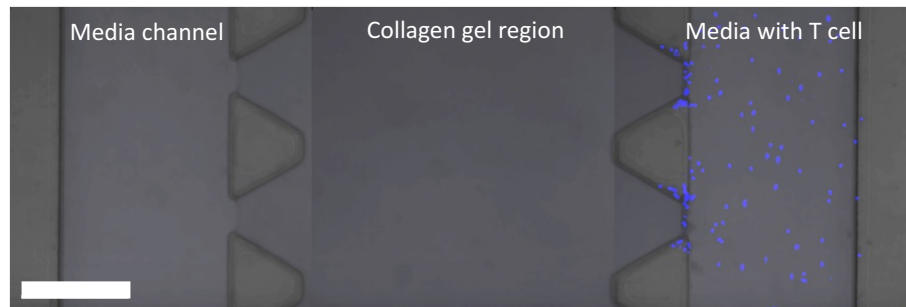

**Figure S1**

**Figure S1. Specific recruitment of engineering T cell into the collagen gel region.** T cells injected in media channel without the presence of HepG2-Env do not migrate into the collagen gel region after 15 hrs (scale bar 400 $\mu$ m).

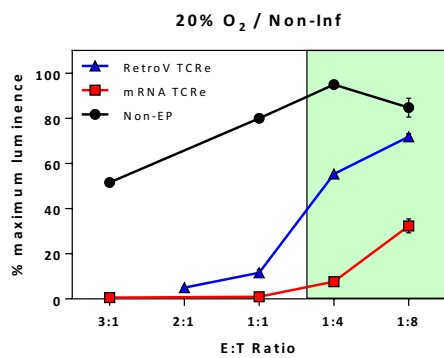

**Figure S2**

**Figure S2. Analysis of different engineered T cell preparates using 2-Dimensional well-based cytotoxicity assay.** Different engineered HBV-specific T cell preparates (RetroV TCR $\epsilon$ ; mRNA TCR $\epsilon$ ; Non-electroporated controls) were co-cultured for 15hrs with luciferase expressing HepG2-Env targets and their cytotoxicity were assessed at different effector to target ratios under normal *in vitro* assay conditions (20% Oxygen and no inflammatory cytokines). Maximum luminence was defined using wells where only luciferase+ HepG2-Env targets were seeded. Green shaded areas denote E:T ratios where targets were not completely killed and data from these E:T ratios were further analyzed.

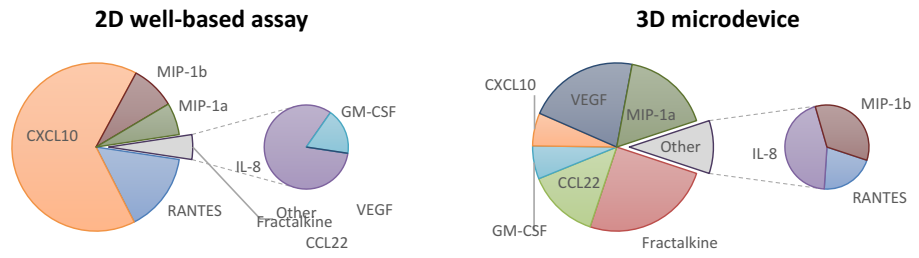

**Figure S3**

**Figure S3. Profile of secreted factors present in the supernatants obtained from classical 2D well-based and 3D microdevice assays.** Concentration of soluble factors in the supernatants obtained from mRNA electroporated TCR-T cells co-cultured in 3D microdevices or in classical 2D assay with HBV envelope expressing HepG2 targets were analyzed. The top 5 soluble factors detected in each system were collated and representative pie charts are displayed. The experiment was performed twice.

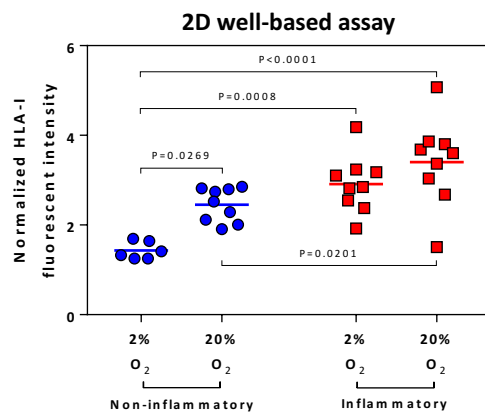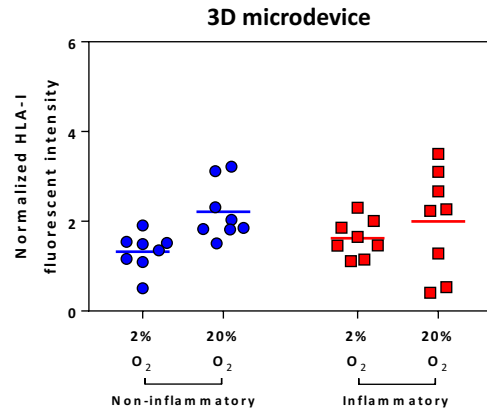

Figure S4

**Figure S4. HLA-I expression on targets cultured in classical 2D well-based and 3D microdevice assays.** Cell surface expression of HLA-I molecules on HBV envelope expressing HepG2 targets cultured in a 3D microdevice or on microwell plates at the indicated conditions are shown. Each dot represents a single experiment. HLA class I fluorescent intensity was normalized by cell number and differences in HLA expression among different treatments were evaluated by Two-way ANOVA with Tukey's multiple comparison test.
